# Supplementary material for: Spectroscopic ellipsometry for compositionally induced bandgap tuning of combinatorial niobium–tantalum anodic oxides
Source: Royal Society of Chemistry journal article supplement (doi:10.1039/c6ra13157c), 2016-01-01
Supplement: c6ra13157c1.pdf [file c6ra13157c1.pdf]

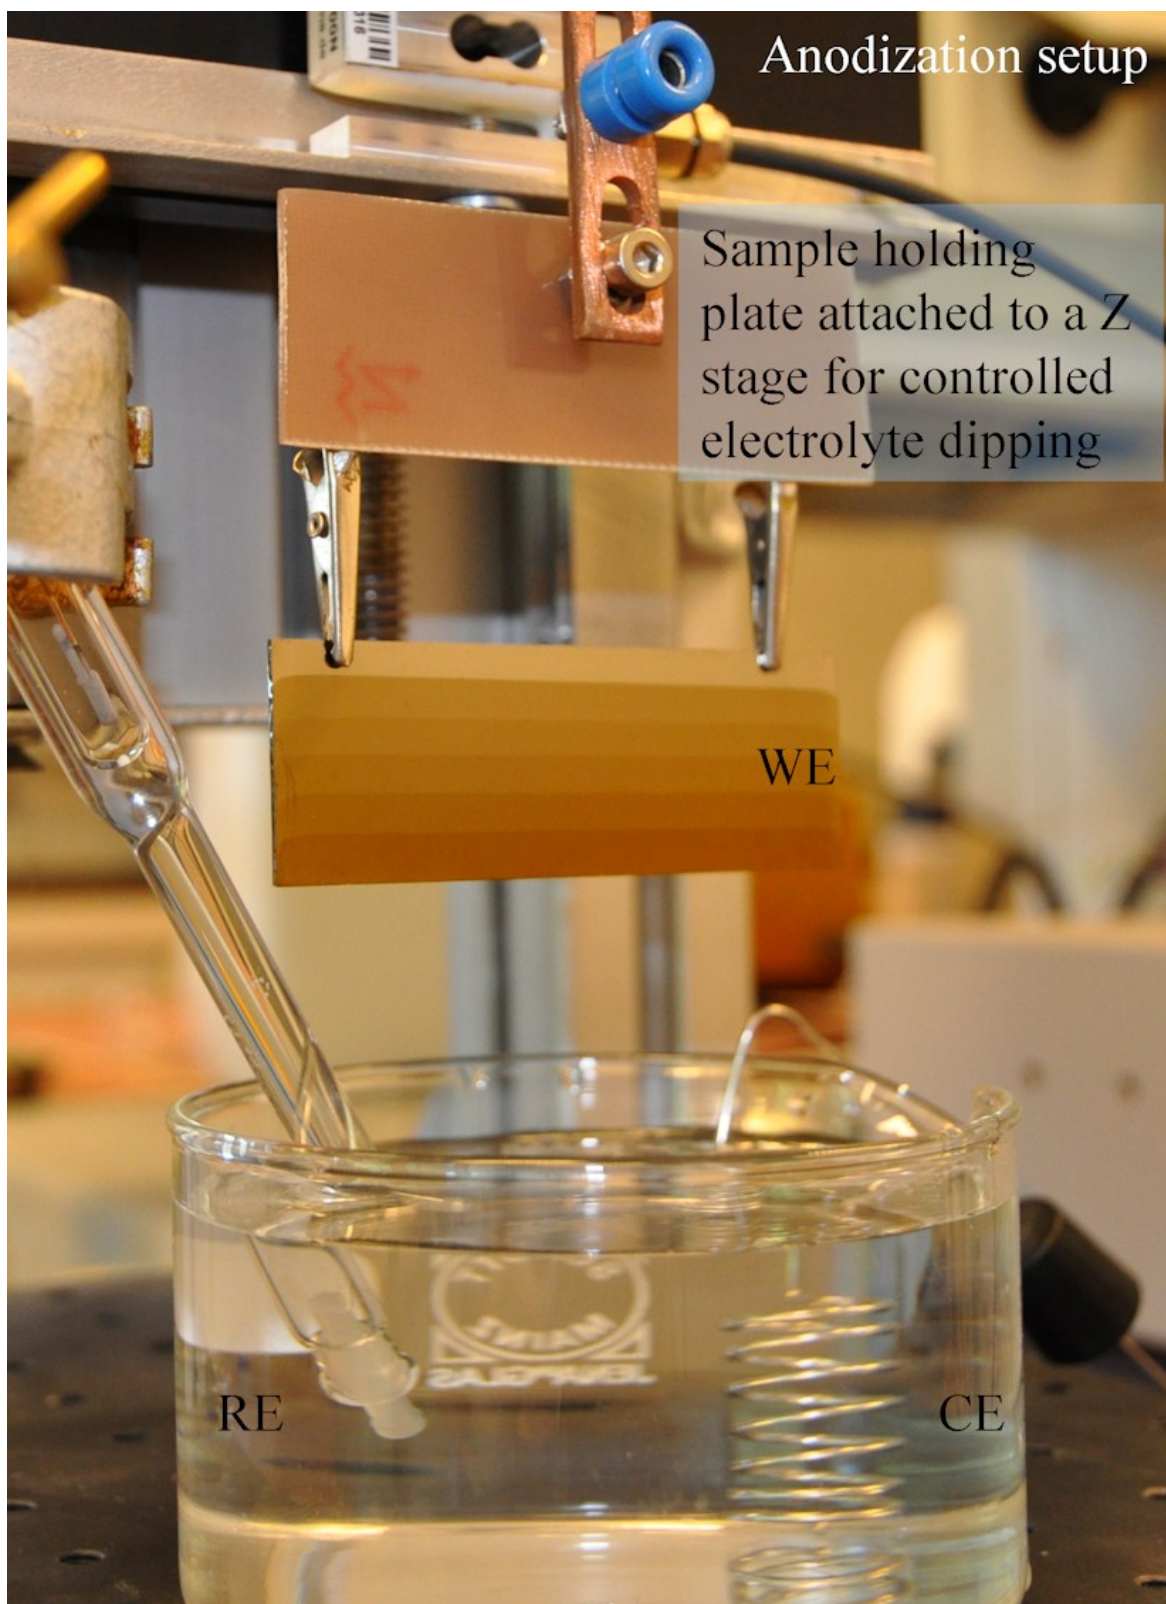

Figure S1

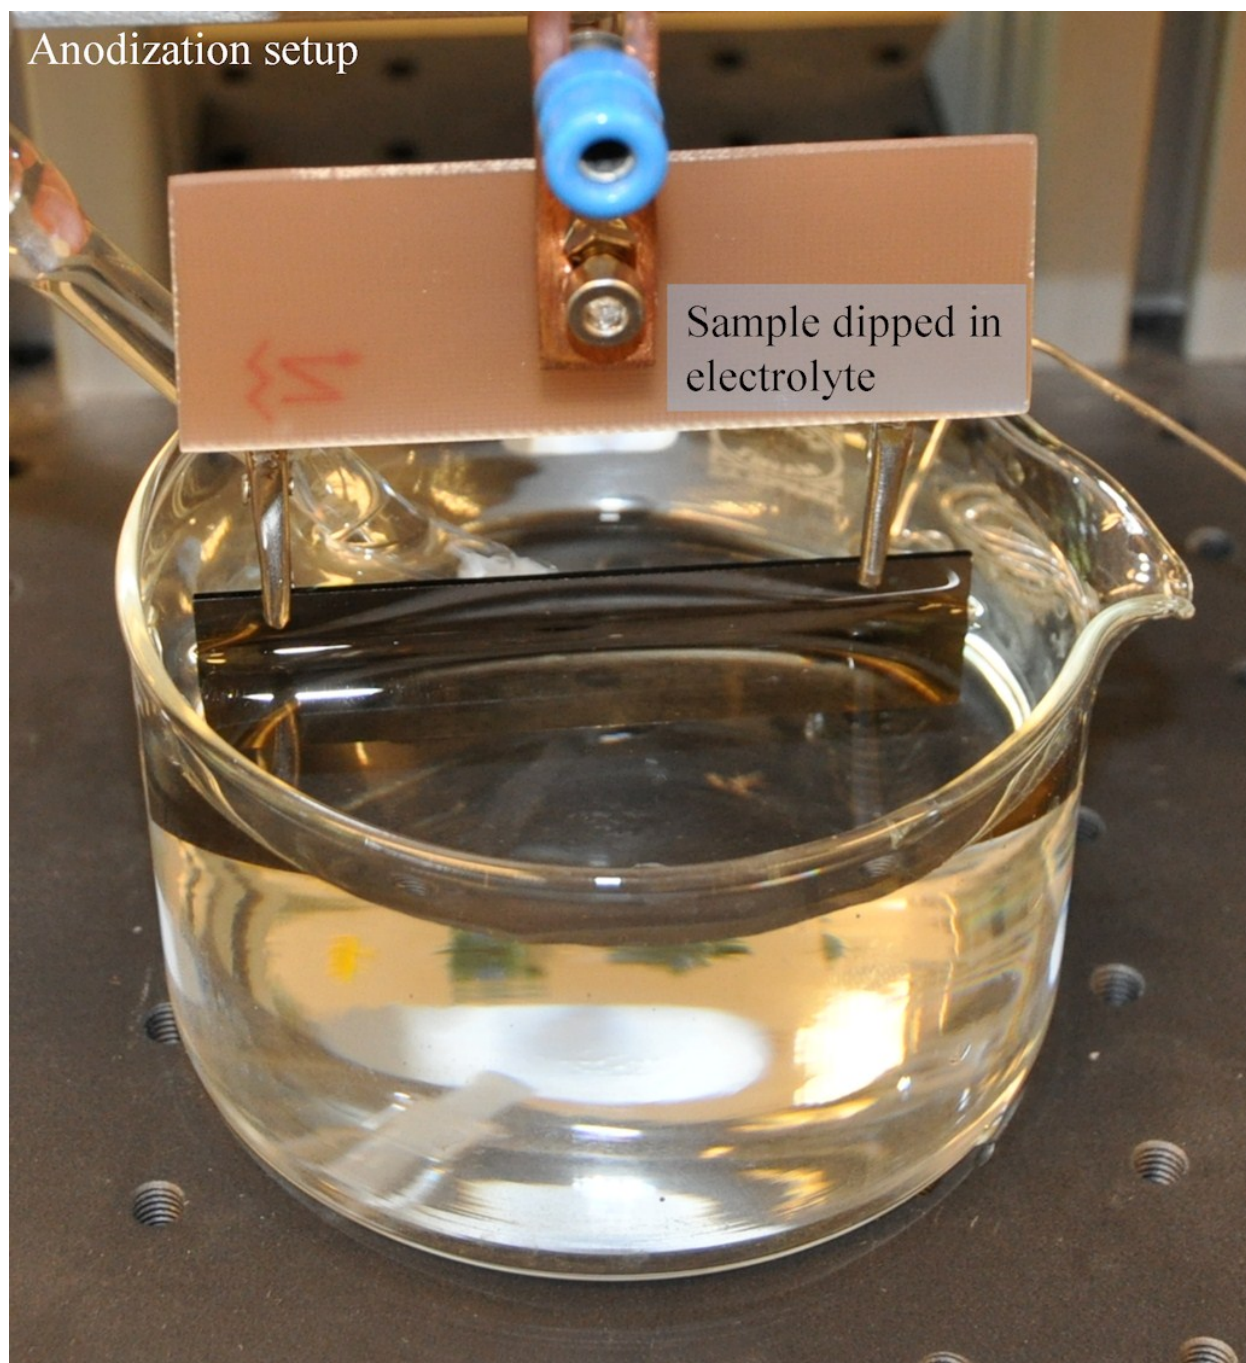

Figure S2



Anodized stripes along the Nb-Ta thin film library

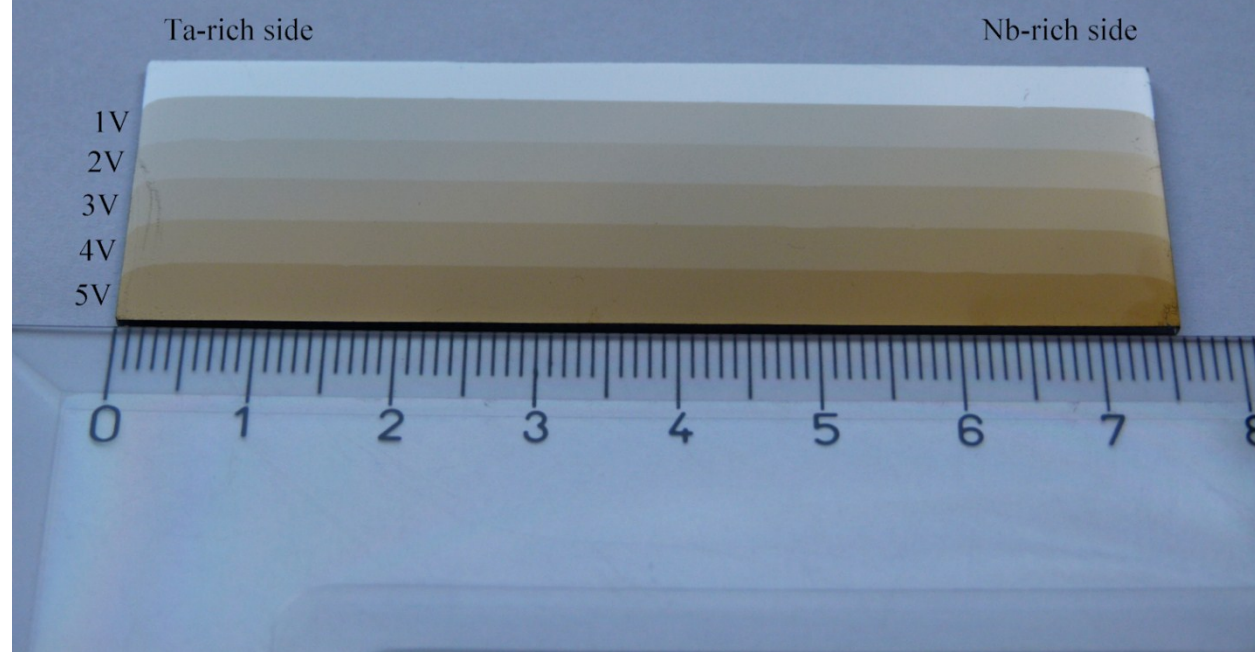

Figure S3

Anodized stripes along the Nb-Ta thin film library

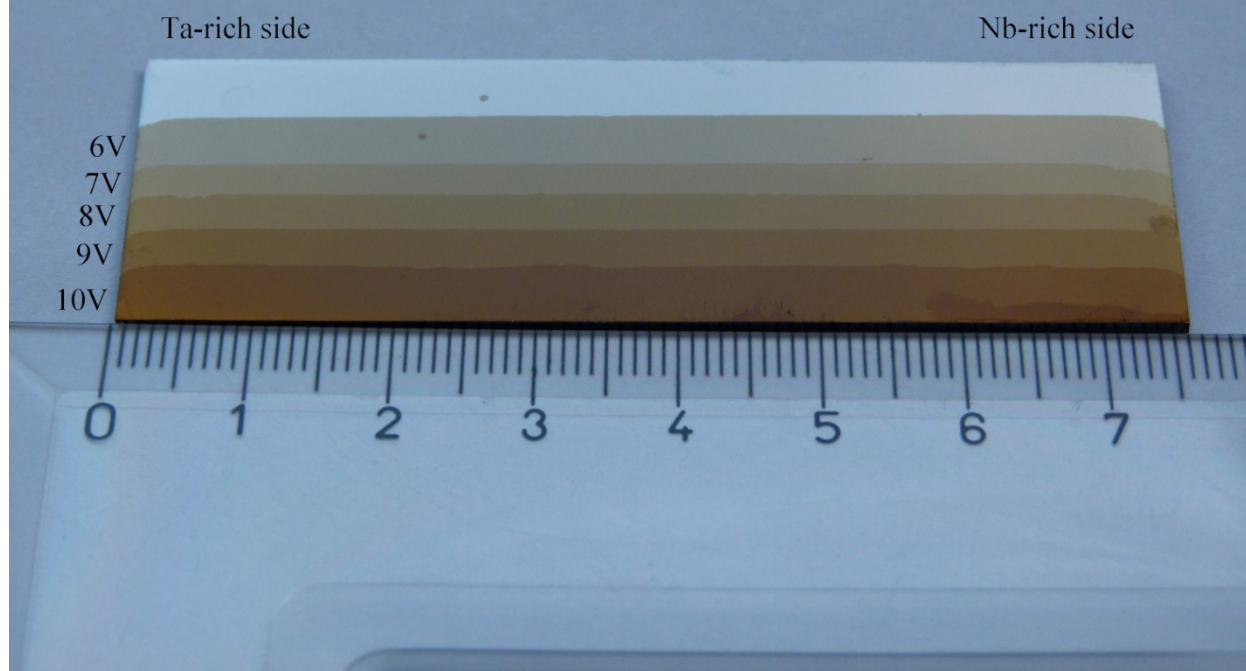

Figure S4

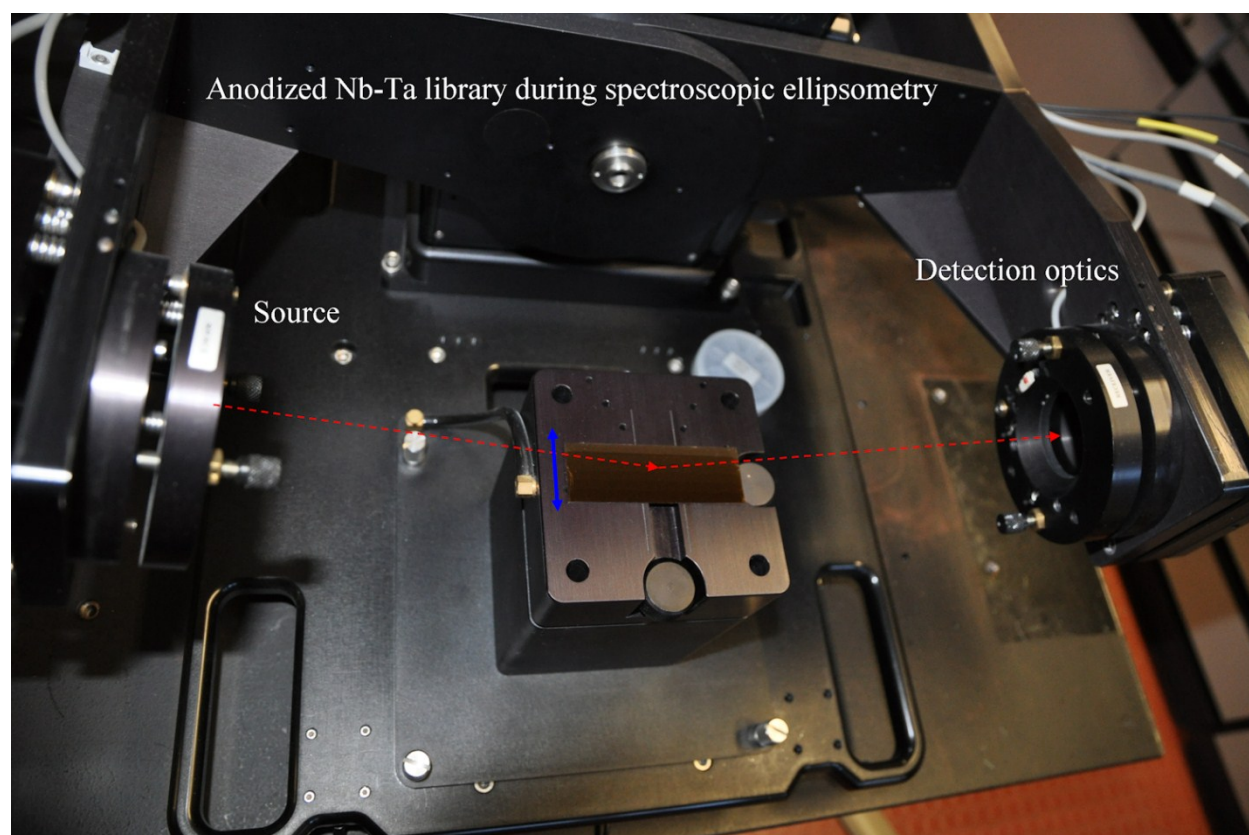

Figure S5
